# Supplementary material
Source: publisher site journal article supplement (https://www.dovepress.com/article/575295)
Supplement: Supplementary file 1 [file 575295_Supplementary%20file%20%25281%2529.docx]

**Supplementary file 1**

**Exploring Health Sciences Students’ Perspectives on Snoring: A Cross-sectional Analysis**

**Section 1: Demographic characteristics of students**

1. Gender:
   - Male
   - Female

1. Colleges:
   - College of Medicine (COM)
   - College of Nursing (CON)
   - College of Dentistry (COD)
   - College of Pharmacy (COP)
   - College of Science and Health Professions (COSHP)
   - College of Applied Medical Science (CAMS)

1. If you are a CAMS student, what is your speciality?
   - Respiratory Therapy
   - Cardiovascular Technology
   - Radiological Science
   - Emergency Medical Services
   - Occupational Therapy
   - Clinical Laboratory Sciences
   - Clinical Nutrition
   - Physiotherapy

1. Your current academic year:
   - 1st
   - 2nd
   - 3rd
   - 4th
   - 5th
   - 6th
   - 7th

**Section 2: Questions related to student’s attitude toward snoring**

1. What is your sleep duration?
   - Less than 2 hours
   - 2 to 3 hours
   - 3 to 4 hours
   - 4 to 5 hours
   - 5 to 6 hours
   - 6 to 7 hours
   - 7 to 8 hours
   - More than 8 hours

1. Do you think people who snore feel embarrassed (ashamed)?
   - Strongly agree
   - Agree
   - Neutral
   - Disagree
   - Strongly disagree

1. Do you believe that snoring can disturb your sleep?
   - Strongly agree
   - Agree
   - Neutral
   - Disagree
   - Strongly disagree

1. Do you find the sound of someone snoring bothers you?
   - Strongly agree
   - Agree
   - Neutral
   - Disagree
   - Strongly disagree

1. Have you experienced any breathing interruptions (apnea) during sleep?
   - Yes
   - No
   - I’m not aware of

1. Do you think snoring can affect an individual’s sleep quality?
   - Strongly agree
   - Agree
   - Neutral
   - Disagree
   - Strongly disagree

1. Do you think people who snore frequently should seek medical help?
   - Strongly agree
   - Agree
   - Neutral
   - Disagree
   - Strongly disagree

1. Do you think individuals who snore experience a lack of concentration?

- Strongly agree
- Agree
- Neutral
- Disagree
- Strongly disagree

**Section 3: Questions related to student’s knowledge of snoring**

1. As we get older, the tendency of habitual snoring increases.

(Habitual snoring is snoring for three or more nights per week)

- Strongly agree
- Agree
- Neutral
- Disagree
- Strongly disagree

2. Family history does not affect habitual snoring.

- Strongly agree
- Agree
- Neutral
- Disagree
- Strongly disagree

3. Do you think that consanguineous marriages (marriages between first-degree cousins) are linked with habitual snoring?

- Strongly agree
- Agree
- Neutral
- Disagree
- Strongly disagree

4. Do you think there is a relationship between snoring and daytime sleepiness?

- Strongly agree
- Agree
- Neutral
- Disagree
- Strongly disagree

5. Habitual snoring is the least common symptom of obstructive sleep apnea (OSA).

- Strongly agree
- Agree
- Neutral
- Disagree
- Strongly disagree

6. Water-pipe smoking (hookah/shisha )  is an expected risk factor that increases the likelihood of habitual snoring.

- Strongly agree
- Agree
- Neutral
- Disagree
- Strongly disagree

7. Habitual snoring increases the risk of developing medical conditions such as high blood pressure (hypertension).

- Strongly agree
- Agree
- Neutral
- Disagree
- Strongly disagree

8. "Using Continuous Positive Airway Pressure (CPAP) may increase snoring."

- Strongly agree
- Agree
- Neutral
- Disagree
- Strongly disagree

9. Snoring is more prevalent among males.

- Strongly agree
- Agree
- Neutral
- Disagree
- Strongly disagree

10. Do you think lack of sleep (sleep deprivation) is associated with snoring?

- Strongly agree
- Agree
- Neutral
- Disagree
- Strongly disagree

11. GERD (gastroesophageal reflux disease) is more likely to occur in people who snore.

- Strongly agree
- Agree
- Neutral
- Disagree
- Strongly disagree

12. Headache is often linked to habitual snoring.

- Strongly agree
- Agree
- Neutral
- Disagree
- Strongly disagree

13. Do you think self-reported snoring is associated with aortic enlargement in Marfan syndrome?

- Strongly agree
- Agree
- Neutral
- Disagree
- Strongly disagree

14. Snoring is a risk factor for dyslipidemia.

- Strongly agree
- Agree
- Neutral
- Disagree
- Strongly disagree

15. Attention to snoring could potentially aid in the early detection of Metabolic-associated fatty liver disease (MAFLD).

- Strongly agree
- Agree
- Neutral
- Disagree
- Strongly disagree

16. Snoring can be influenced by environmental factors such as exposure to air pollution and indoor humidity levels.

- Strongly agree
- Agree
- Neutral
- Disagree
- Strongly disagree

17. The chance of experiencing nasal symptoms such as nasal congestion and sneezing increases with snoring.

- Strongly agree
- Agree
- Neutral
- Disagree
- Strongly disagree
